# Supplementary material for: Modeling the catalyst resting state in aryl tin(iv) polymerizations of lactide and estimating the relative rates of transamidation, transesterification and chain transferElectronic supplementary information (ESI) available: kinetic data of reactions C and E in Scheme 2. See http://www.rsc.org/suppdata/nj/b3/b306700a/
Source: Royal Society of Chemistry journal article supplement (doi:10.1039/b306700a), 2004-01-01
Supplement: b306700a.doc [file b306700a.doc]

# ESI

Below are two representation plots taken from Scheme 2.

The first plot shows reaction **C** in scheme 2 where plots of ln(B/A) B = Ph3SnOCHMeC(O)OEt and A = Ph3SnNMe2 versus time (s) indicated a straight line. The gradient of the line was used to determine that rate constant (see experimental of paper for details). The second plot shows reaction **E** in scheme 2 where plots of

ln(x) (x = -see experimental for explanation of terms of this equation) versus time (s) indicated a straight line. The gradient of the line was used to determine the rate constant (see experimental of paper for details).

Both of these plots are representative of the other data collected to determine the other rate constants presented in Scheme 2.
